# Supplementary material for: The Clinical Value of PELP1 for Breast Cancer: A Comparison with Multiple Cancers and Analysis in Breast Cancer Subtypes
Source: PubMed Central journal article supplement — Cancer Res Treat. 2018 Aug 23;51(2):706–17. doi: 10.4143/crt.2018.316 (PMC6473277; doi:10.4143/crt.2018.316), 2018-08-23
Supplement: crt-2018-316-suppl1.pdf [file crt-2018-316-suppl1.pdf]

**S1 Table.** Details on immunohistochemical analysis

| Marker     | Company                  | Clone         | Dilution    | Antigen retrieval | Incubation condition (min, °C) | Assessment | Cutoff |
|------------|--------------------------|---------------|-------------|-------------------|--------------------------------|------------|--------|
| ER         | Neomarkers               | SP1           | Pre-diluted | EDTA pH8          | 32, 37                         | N          | 1%     |
| PR         | Ventana                  | IE2           | Pre-diluted | EDTA pH8          | 32, 37                         | N          | 1%     |
| AR         | Lab Vision               | AR441         | 1:100       | EDTA pH8          | 56, 37                         | N          | ≤ 1%   |
| Ki67       | Ventana                  | 41912         | Pre-diluted | EDTA pH8          | 32, 37                         | N          | 20%    |
| EGFR       | Ventana                  | 3C6           | pre-diluted | EDTA pH8          | 32, 37                         | M          | 5%     |
| HER2       | Ventana                  | 4B5           | Pre-diluted | EDTA pH8          | 16, 37                         | M          | 3+     |
| CK5/6      | Dako                     | D5/6 B4       | 1:40        | EDTA pH8          | 32, 37                         | C, M       | 5%     |
| CK14       | Neomarker                | LL002         | 1:100       | EDTA pH8          | 32, 37                         | C, M       | 5%     |
| Vimentin   | Dako                     | V9            | 1:2,000     | EDTA, pH8         | 24, RT                         | C, M       | 10%    |
| p-cadherin | BD transduction lab      | 56/p-cadherin | 1:200       | EDTA, pH8         | 32, 37                         | C, M       | 10%    |
| MGB        | Ventana                  | 31A5          | Pre-diluted | EDTA pH8          | 32, 37                         | C          | 5%     |
| GCDFP15    | Novocastra               | 23A3          | 1:100       | EDTA pH8          | 32, 37                         | C          | 5%     |
| GATA-3     | Biocare Medical          | L50-823       | 1:150       | EDTA pH8          | 32, 37                         | N          | 5%     |
| PELP-1     | Bethyl Laboratories Inc. | Polyclonal    | 1:500       | EDTA pH8          | 32, 37                         | N          | -      |

ER, estrogen receptor; N, nuclear; PR, progesterone receptor; AR, androgen receptor; EGFR, epidermal growth factor receptor; M, membrane; HER2, human epidermal growth factor receptor 2; CK, cytokeratin; C, cytoplasmic; RT, room temperature; MGB, mammaglobin; GCDFP15, gross cystic disease fluid protein 15; PELP1, proline, glutamic acid, and leucine-rich protein 1.
