# Supplementary material for: The Clinical Value of PELP1 for Breast Cancer: A Comparison with Multiple Cancers and Analysis in Breast Cancer Subtypes
Source: PubMed Central journal article supplement — Cancer Res Treat. 2018 Aug 23;51(2):706–17. doi: 10.4143/crt.2018.316 (PMC6473277; doi:10.4143/crt.2018.316), 2018-08-23
Supplement: crt-2018-316-suppl2.pdf [file crt-2018-316-suppl2.pdf]

**S2 Table.** Characteristic of the cohorts

|                                                | No. (%)     |
|------------------------------------------------|-------------|
| <b>Breast</b>                                  |             |
| Age, mean (yr)                                 | 54.6        |
| Tumor size, mean (cm)                          | 2.67        |
| Sex                                            |             |
| Male                                           | 0           |
| Female                                         | 1,073 (100) |
| Grade                                          |             |
| 1                                              | 162 (15.1)  |
| 2                                              | 422 (39.3)  |
| 3                                              | 489 (45.6)  |
| Histotype                                      |             |
| Invasive breast cancer-not otherwise specified | 940 (87.6)  |
| Invasive lobular cancer                        | 27 (2.5)    |
| Invasive micropapillary cancer                 | 15 (1.4)    |
| Papillary carcinoma                            | 5 (0.5)     |
| Medullary cancers                              | 47 (4.3)    |
| Metaplastic cancer                             | 11 (1.0)    |
| Mucinous cancer                                | 9 (0.9)     |
| Neuroendocrine cancer                          | 6 (0.6)     |
| Others <sup>a)</sup>                           | 13 (1.2)    |
| Molecular subtype                              |             |
| Luminal A                                      | 487 (45.3)  |
| Luminal B                                      | 322 (30.0)  |
| HER2-OE                                        | 106 (9.9)   |
| BLBC                                           | 66 (6.2)    |
| 5NP                                            | 82 (7.6)    |
| Unknown                                        | 100 (9.3)   |

---

|                                          |            |
|------------------------------------------|------------|
| <b>Pulmonary</b>                         |            |
| Age, mean (yr)                           | 64.4       |
| Tumor size, mean (cm)                    | 3.99       |
| Sex                                      |            |
| Male                                     | 208 (64.0) |
| Female                                   | 105 (32.3) |
| Unknown                                  | 12 (3.7)   |
| Histotype                                |            |
| Adenocarcinoma (AD)                      | 194 (59.7) |
| Squamous cell carcinoma (SCC)            | 109 (33.5) |
| Adenosquamous carcinoma                  | 9 (2.8)    |
| Large cell lung cancer (LCC)             | 8 (2.5)    |
| Lymphoepithelioma-like carcinoma (LELC)  | 2 (0.6)    |
| Small cell lung cancer (SCLC)            | 2 (0.6)    |
| Large cell neuroendocrine cancer (LCNEC) | 1 (0.3)    |
| Stage                                    |            |
| I                                        | 113 (34.8) |
| II                                       | 68 (20.9)  |
| III                                      | 87 (26.8)  |
| IV                                       | 44 (13.5)  |
| Unknown                                  | 13 (4.0)   |
| Smoking status                           |            |
| Ex-smoker                                | 136 (41.8) |
| Non-smoker                               | 119 (36.6) |
| Smoker                                   | 37 (11.4)  |
| Unknown                                  | 33 (10.2)  |
| <b>Ovarian</b>                           |            |
| Age, mean (yr)                           | 50.7       |
| Tumor size, mean (cm)                    | 10.33      |

---

---

|                       |           |
|-----------------------|-----------|
| <b>Histotype</b>      |           |
| Serous adenocarcinoma | 32 (32.0) |
| Endometrial carcinoma | 30 (30.0) |
| Clear cell carcinoma  | 24 (24.0) |
| Others <sup>b)</sup>  | 14 (14.0) |
| <b>Laterality</b>     |           |
| Left                  | 42 (38.9) |
| Right                 | 34 (31.5) |
| Bilateral             | 32 (29.6) |
| <b>FIGO staging</b>   |           |
| I                     | 60 (54.1) |
| II                    | 35 (31.5) |
| III                   | 15 (13.5) |
| IV                    | 1 (0.9)   |
| <b>Gastric</b>        |           |
| Age, mean (yr)        | 66.7      |
| <b>Sex</b>            |           |
| Male                  | 85 (64.9) |
| Female                | 46 (35.1) |
| <b>Histotype</b>      |           |
| Non-diffused          | 81 (61.8) |
| Diffused              | 50 (38.2) |
| <b>Stage</b>          |           |
| I                     | 14 (10.7) |
| II                    | 17 (13.0) |
| III                   | 52 (39.7) |
| IV                    | 46 (35.1) |
| Unknown               | 2 (1.5)   |
| <b>Colorectal</b>     |           |

---

|                |            |
|----------------|------------|
| Age, mean (cm) | 68         |
| Sex            |            |
| Male           | 86 (41.5)  |
| Female         | 119 (57.5) |
| Unknown        | 2 (1.0)    |
| Stage          |            |
| I              | 22 (10.6)  |
| II             | 90 (43.5)  |
| III            | 69 (33.3)  |
| IV             | 22 (10.6)  |
| Unknown        | 2 (1.0)    |

HER2-OE, HER2-overexpressed; BLBC, basal-like breast cancer; 5NP, quintuple negative; FIGO, International Federation of Gynecology and Obstetrics. <sup>a)</sup>Other miscellaneous histotypes included tubular cancer, tubular-lobular cancer and signet cell carcinoma, <sup>b)</sup>Other ovarian histotypes included mixed cell types with endometrial/mucinous/serous/papillary and clear cell carcinoma, signet ring cell carcinoma.
