# Supplementary material for: The Clinical Value of PELP1 for Breast Cancer: A Comparison with Multiple Cancers and Analysis in Breast Cancer Subtypes
Source: PubMed Central journal article supplement — Cancer Res Treat. 2018 Aug 23;51(2):706–17. doi: 10.4143/crt.2018.316 (PMC6473277; doi:10.4143/crt.2018.316), 2018-08-23
Supplement: crt-2018-316-suppl3.pdf [file crt-2018-316-suppl3.pdf]

**S3 Table.** Clinico-pathological association of PELP1 expression in pulmonary cancers

| Feature                           | PELP1 |       |         | Total | p-value |
|-----------------------------------|-------|-------|---------|-------|---------|
|                                   | Low   | Focal | Diffuse |       |         |
| <b>Histotype</b>                  |       |       |         |       |         |
| Adenocarcinoma                    | 122   | 7     | 59      | 188   | < 0.001 |
| Squamous cell carcinoma           | 35    | 1     | 68      | 98    |         |
| Others                            | 3     | 1     | 19      | 23    |         |
| <b>EGFR status</b>                |       |       |         |       |         |
| Wild type                         | 50    | 6     | 63      | 119   | < 0.001 |
| Mutant                            | 73    | 2     | 14      | 89    |         |
| <b>Stage</b>                      |       |       |         |       |         |
| I                                 | 63    | 2     | 44      | 109   | 0.598   |
| II                                | 33    | 2     | 30      | 65    |         |
| III                               | 40    | 2     | 43      | 85    |         |
| IV                                | 20    | 3     | 20      | 43    |         |
| <b>Smoking status</b>             |       |       |         |       |         |
| Ex-smoker                         | 53    | 2     | 77      | 131   | < 0.001 |
| Non-smoker                        | 79    | 4     | 32      | 115   |         |
| Smoker                            | 14    | 3     | 19      | 36    |         |
| <b>Adenocarcinoma EGFR status</b> |       |       |         |       |         |
| Wild type                         | 47    | 5     | 46      | 98    | < 0.001 |
| Mutant                            | 73    | 2     | 12      | 87    |         |
| <b>Age (yr)</b>                   |       |       |         |       |         |
| Mean                              | 63.7  | 58.2  | 65.7    | 64.4  | 0.126   |
| SD                                | 11.7  | 14.0  | 11.1    | 11.6  |         |
| Range                             | 30-64 | 27-77 | 28-90   |       |         |
| <b>Size (cm)</b>                  |       |       |         |       |         |
| Mean                              | 3.78  | 3.40  | 4.29    | 4.00  | 0.205   |
| SD                                | 2.16  | 2.77  | 2.46    | 2.32  |         |

---

|       |          |         |          |
|-------|----------|---------|----------|
| Range | 0.7-13.0 | 1.1-9.0 | 0.5-11.0 |
|-------|----------|---------|----------|

---

PELP1, proline, glutamic acid, and leucine-rich protein 1; EGFR, epidermal growth factor receptor; SD, standard deviation.
